# Supplementary material for: FDM 3D-Printed Sustained-Release Gastric-Floating Verapamil Hydrochloride Formulations with Cylinder, Capsule and Hemisphere Shapes, and Low Infill Percentage
Source: MDPI journal article supplement (doi:10.3390/pharmaceutics14020281), 2022-01-25
Supplement: s1 [file s1]

# Supplementary Materials: FDM 3D-Printed Sustained-Release Gastric-Floating Verapamil Hydrochloride Formulations with Cylinder, Capsule and Hemisphere Shapes, and Low Infill Percentage

Haonan Qian, Di Chen, Xiangyu Xu, Rui Li, Guangrong Yan and Tianyuan Fan

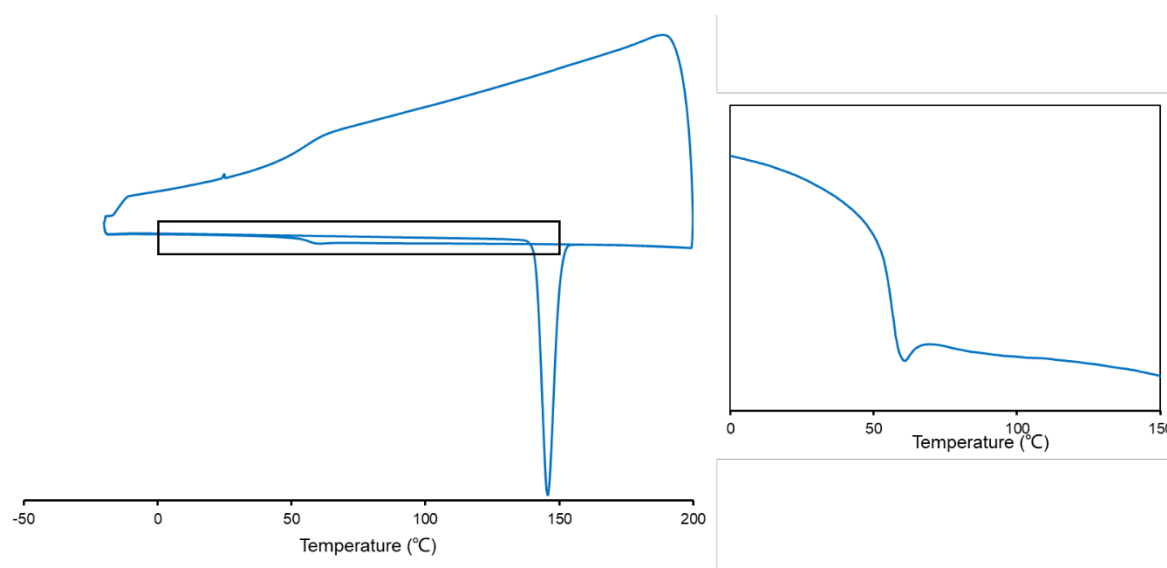

**Figure S1.** DSC results of verapamil hydrochloride.

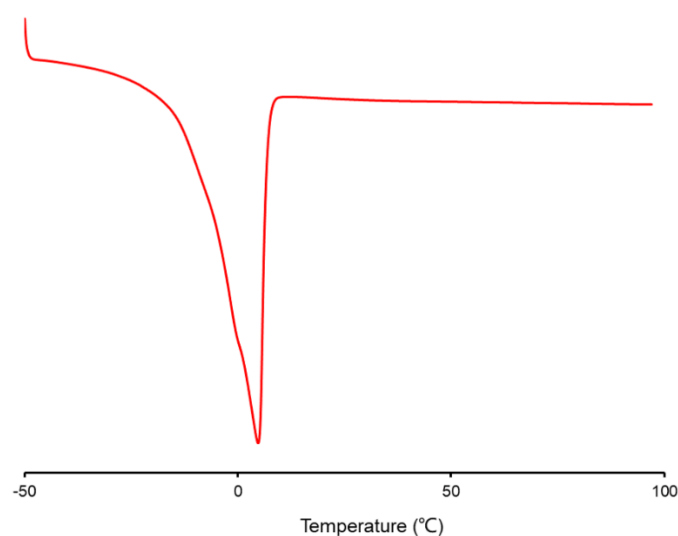

**Figure S2.** DSC results of PEG 400.
